# Supplementary material for: Rule-Based Models of the Interplay between Genetic and Environmental Factors in Childhood Allergy
Source: PLoS One. 2013 Nov 19;8(11):e80080. doi: 10.1371/journal.pone.0080080 (PMC3833974; doi:10.1371/journal.pone.0080080)
Supplement: Table S1 — Overview of lifestyle- and environmental factors in PARSIFAL and BAMSE. Name and description of all lifestyle- and environmental factors used in the analysis of gene-environment interactions in PARSIFAL by applying feature selection and rule-based classification. BAMSE data available for replication is indicated in the “BAMSE code column”. (XLSX) [file pone.0080080.s002.xlsx]

## Sheet: Table S1
Table S1. Overview of lifestyle- and environmental factors in PARSIFAL and BAMSE
Name and description of all lifestyle- and environmental factors used in the analysis of
gene-environment interactions in PARSIFAL by applying feature selection and rule-based classification.
BAMSE data available for replication is indicated in the “BAMSE code column”.
				Data distribution PARSIFAL (n=count)							Data distribution BAMSE (n=count)
Name	DESCRIPTION	PARSIFAL code	BAMSE code	0	1	2	3	4	5	mv	0	1	2	3	4	5	mv
sex	Sex of the child	1=boy, 2=girl	1=boy, 2=girl		1538	1488				1		1034	977				1
group	The PARSIFAL children represents four groups	1=Farm children, 2=Steiner school children, 3=Farm reference children, 4=Steiner reference children	NA		1272	668	640	446		1
country of origin	Country of origin (child)	1=Sweden, 2=Switzerland, 3=the Netherlands, 4=Germany, 5=Austria	NA		743	321	497	809	656	1
age	Child's age as a categorical variable	1=5-6 years, 2=7-8 years, 3=9 years, 4=10-11 years, 5=12-13 years	NA		290	956	537	930	313	1
older siblings	Older siblings as a categorical variable	0=Child has no older siblings, 1=1 older sibling, 2=2 older siblings, 3=3 or more older siblings	1=yes, 2=no	1098	947	593	388			1		967	1036				9
parent's education	Parent's education as a categorical variable	1=Elementary school or lower, 2=Gymnasium, 3=University	1= Elementary , 2= Gymnasium , 3= University		578	1462	905			82		35	886	1080			11
use of antipyretics	Use of antipyretics (child)	1=Never use, 2=1st use>12 months, 3=1st use 0-12 months	NA		499	927	1443			158
use of antibiotics	Use of Antibiotics (child)	1=Never use, 2=1st use>12 months, 3=1st use 0-12 months	1= never, 2= First use >12 months, 3= First use 0-12 months		547	1364	949			167		103	1028	834			47
MMR vaccination	MMR vaccination (child)	1=yes, 2=no	NA		1948	527				552
child had measles	Child had measles	1=yes, 2=no	NA		473	2328				226
housholds pets during the first year of life	Housholds pets during the first year of life	1=yes, 2=no	1=yes, 2=no		1240	1761				26		232	1738				42
maternal asthma	Maternal asthma (qc1a)	1=yes, 2=no	1=yes, 2=no		211	2728				88		239	1764				9
maternal rhinoconjunctivitis	Maternal rhinoconjunctivitis (qc1b)	1=yes, 2=no	1=yes, 2=no		491	2464				72		542	1461				9
maternal eczema	Maternal eczema (qc1c)	1=yes, 2=no	1=yes, 2=no		469	2475				83		476	1526				10
maternal asthma and/or rhinoconjunctivitis	Mother's reported asthma and/or rhinoconjunctivitis	1=yes, 2=no	1=yes, 2=no		585	2419				23		604	1399				9
paternal asthma	Paternal asthma (qc2a)	1=yes, 2=no	1=yes, 2=no		203	2709				115		208	1781				23
paternal rhinoconjunctivitis	Paternal rhinoconjunctivitis (qc2b)	1=yes, 2=no	1=yes, 2=no		383	2535				109		556	1433				23
paternal eczema	Paternal eczema (qc2c)	1=yes, 2=no	1=yes, 2=no		328	2576				123		334	1655				23
paternal asthma and/or rhinoconjunctivitis	Father's reported asthma and/or rhinoconjunctivitis	1=yes, 2=no	1=yes, 2=no		492	2484				51		620	1369				23
maternal smoking during pregnancy	Maternal smoking during pregnancy	1=yes, 2=no	1=yes, 2=no		281	2713				33		176	1794				42
mother smoked during child 1:st year	Mother smoked during child 1:st year (qd9b)	1=yes, 2=no	1=yes, 2=no		402	2495				130		240	1762				10
current environmental smoke at home	Current environmental smoking at home	1=yes, 2=no	1=yes, 2=no		504	2498				25		356	1618				38
Mother worked on a farm during pregnancy or lactation	Mother worked on a farm during pregnancy or lactation (qd23)	1=yes, 2=no	NA		1191	1818				18
Mother worked on a farm during pregnancy	Mother worked on a farm during pregnancy (qd23A)	1=yes, 2=no	NA		1001	1992				34
Mother worked on a farm during lactation	Mother worked on a farm during lactation (qd23B)	1=yes, 2=no	NA		810	2117				100
Number of different farm animal species the mother had contact with during pregnancy (qd7a-f)	Number of different farm animal species the mother had contact with during pregnancy (qd7a-f)	0-6	NA	1664	343	285	157	63	19	496
Number of different farm animal species the child had contact with	Number of different farm animal species the child had contact with (qd5a-f)	0-6	NA	1220	514	382	290	128	64	429
Child lives on farm	Child lives on farm (qd18)	1=yes, 2=no	NA		1329	1682				16
Child wear/wore wool clothing directly on the skin	Child wear/wore wool clothing directly on the skin (qe9a)	1=yes, 2=no	NA		509	1985				533
Breast feeding	Breast feeding exclusively for 5 months or more.	1=never breastfeed, 2=0-4 months, 3=5 months or more	1= never breast feed (=0 months), 2= less than 5 months, 3= 5 months or more		457	1454	1028			88		119	552	1295			46
Formula feed during babyhood	Formula feed during babyhood (qe6).	1=yes, 2=no	1=yes, 2=no		327	166				2534		146	1822				44
Child drank mostly farm milk during first 12 months	Child drank mostly farm milk during first 12 months (qf1b).	1=yes, 2=no or no answer	NA		969	2057				1
Use of organic and biodynamic food	Use of organic and biodynamic food	1=Conventional, 2=Org/Biodynamic	1 = Other or no answer, 2 = Biodynamisk		2039	879				109		1996	15				1
na= not applicable
mv=missing value
